# Supplementary material
Source: ML conference proceedings conference paper supplement (https://proceedings.mlr.press/v70/lee17a.html)
Supplement: Supplementary file 1 [file lee17a-supp.pdf]

---

# Supplementary Material: Bayesian inference on random simple graphs with power law degree distributions

---

Juho Lee<sup>1</sup> Creighton Heaukulani<sup>2</sup> Zoubin Ghahramani<sup>2,3</sup> Lancelot F. James<sup>4</sup> Seungjin Choi<sup>1</sup>

## 1. Proofs

We prove [Theorem 3.1](#) and [Theorem 5.1](#) in the paper. First consider the following redefinition of our model with slightly different notation; let  $W_n$  be a random variable constrained on  $(0, C_n]$ , with density

$$f_n(dw) = \frac{1}{Z_n} w^{-\alpha-1} (1 - e^{-w}) \mathbb{1}_{\{0 < w \leq C_n\}} dw, \quad (1)$$

where  $C_1, C_2, \dots$ , is a sequence of positive numbers satisfying

$$\lim_{n \rightarrow \infty} C_n = \infty, \quad \lim_{n \rightarrow \infty} C_n^\alpha / n = 0. \quad (2)$$

Note that  $Z_n \rightarrow \Gamma(1 - \alpha)/\alpha$  as  $n \rightarrow \infty$ , and so the sequence of densities  $f_n(dw)$  converges pointwise to the density of the BFRY distribution

$$f(w) = \frac{\alpha}{\Gamma(1 - \alpha)} w^{-\alpha-1} (1 - e^{-w}) \mathbb{1}_{\{w > 0\}}, \quad (3)$$

and  $W_n$  converges in distribution to a BFRY random variable. Let  $W_{n,1}, \dots, W_{n,n}$  be  $n$  i.i.d. copies of  $W_n$ . A random simple graph  $X$  is then defined to be a collection of Bernoulli random variables as follows:

$$\mathbb{P}\{X_{ij} = 1 \mid r_{i,j}\} = \frac{r_{i,j}}{1 + r_{i,j}}, \quad r_{i,j} = U_i U_j, \quad U_i = \frac{W_{n,i}}{\sqrt{L_n}}, \quad (4)$$

where  $L_n := \sum_{i=1}^n W_{n,i}$ . We will write  $X \mid r \sim \text{GRG}(n, r)$ , where  $r := (r_{i,j} : i < j \leq n)$ .

We begin with a sequence of Lemmas. Define a sequence of random variables  $V_{s,n}$ , for every  $s, n \geq 1$ , by

$$V_{s,n} := \frac{W_n}{C_n^{s-\alpha}}. \quad (5)$$

Let  $V_{s,n,1}, \dots, V_{s,n,n}$  be  $n$  i.i.d. copies of  $V_{s,n}$ , and denote the empirical mean of these copies by

$$\bar{V}_{s,n} := \frac{1}{n} \sum_{i=1}^n V_{s,n,i}. \quad (6)$$

The expectation of  $V_{s,n}$  is finite for all  $s, n < \infty$ , and is computed as

$$\begin{aligned} \mathbb{E}[V_{s,n}] &= \frac{1}{Z_n C_n^{s-\alpha}} \int_0^{C_n} w^{s-\alpha-1} (1 - e^{-w}) dw \\ &= \frac{1}{Z_n} \left\{ \frac{1}{s - \alpha} - \frac{\gamma(s - \alpha, C_n)}{C_n^{s-\alpha}} \right\}, \end{aligned} \quad (7)$$

---

<sup>1</sup>Pohang University of Science and Technology (POSTECH), Pohang, South Korea <sup>2</sup>University of Cambridge, Cambridge, United Kingdom <sup>3</sup>Uber AI Labs, San Francisco, CA, USA <sup>4</sup>Hong Kong University of Science and Technology (HKUST), Clearwater Bay, Hong Kong. Correspondence to: Juho Lee <stonecold@postech.ac.kr>.

where  $\gamma(\cdot, \cdot)$  is the lower incomplete gamma function.

Let  $\xrightarrow{\mathbb{P}}$  denote convergence in probability. The following lemma is a standard mean convergence result:

**Lemma 1.1.**  $\bar{V}_{s,n} \xrightarrow{\mathbb{P}} \mathbb{E}[V_{s,n}]$ , as  $n \rightarrow \infty$ .

*Proof.* For all  $\varepsilon > 0$ , by Chebyshev's inequality and the condition in Eq. (2),

$$\mathbb{P}\{|\bar{V}_{s,n} - \mathbb{E}[V_{s,n}]| \geq \varepsilon\} \leq \frac{\text{Var}(V_{s,n})}{n\varepsilon^2} \leq \frac{\mathbb{E}[V_{s,n}^2]}{n\varepsilon^2} = \frac{1}{Z_n\varepsilon^2} \left\{ \frac{C_n^\alpha}{n(2s-\alpha)} - \frac{\gamma(2s-\alpha, C_n)}{nC_n^{2s-2\alpha}} \right\} \rightarrow 0, \quad (8)$$

as  $n \rightarrow \infty$ , as desired. □

The following lemma will be used to study various higher order moments in later results:

**Lemma 1.2.** For  $s \geq 2$ ,

$$M_{s,n} := \frac{\sum_{i=1}^n W_{n,i}^s}{(\sum_{i=1}^n W_{n,i})^s} \xrightarrow{\mathbb{P}} 0, \quad \text{as } n \rightarrow \infty. \quad (9)$$

*Proof.* We have

$$M_{s,n} = \frac{nC_n^{s-\alpha}\bar{V}_{s,n}}{n^s C_n^{s-s\alpha}\bar{V}_{1,n}^s} = \left(\frac{C_n^\alpha}{n}\right)^{s-1} \frac{\bar{V}_{s,n}}{\bar{V}_{1,n}^s}. \quad (10)$$

As  $n \rightarrow \infty$ , the first factor on the right hand side clearly converges to zero (c.f. Eq. (2)), and, by Lemma 1.1, the second term converges to a constant in probability. □

Recall that  $D_{n,i} := \sum_{j \neq i} X_{i,j}$  is the degree of the  $i$ -th node in the graph  $X \mid r \sim \text{GRG}(n, r)$ , given by Eq. (4). The following result will show up in later calculations involving the probability generating function (PGF) of the degree random variables  $D_{n,i}$ :

**Lemma 1.3.** For every collection  $t_1, \dots, t_n$  with  $|t_i| \leq 1$ , for  $i \leq n$ ,

$$\mathbb{E}\left[\prod_{i=1}^n t_i^{D_{n,i}} \mid W_{n,1} = w_1, \dots, W_{n,n} = w_n\right] = \prod_{i < j \leq n} \frac{L_n + t_i t_j w_i w_j}{L_n + w_i w_j}, \quad (11)$$

for positive  $w_1, \dots, w_n$ .

*Proof.* The proof is given by Britton et al. (2006). □

The following result studies a representation of the PGF of the degree random variables and their higher order moments:

**Lemma 1.4.** Fix a node  $k \leq n$ . Define

$$F_{n,k}(t; w_k) := \prod_{i \neq k} \frac{L_{n,-k} + w_k + t w_k W_{n,i}}{L_{n,-k} + w_k + w_k W_{n,i}}, \quad \text{for } |t| \leq 1, \text{ and } w_k > 0, \quad (12)$$

where  $L_{n,-k} := \sum_{i \neq k} W_{n,i}$ . Note that the  $s$ -th derivative  $F_{n,k}^{(s)}(t; w_k)$  exists for all  $s \geq 0$ . For all  $s \geq 0$ , the following hold:

1.  $F_{n,k}^{(s)}(t; w_k)$  is uniformly bounded, for all  $n \geq 1$ ;
2.  $F_{n,k}^{(s)}(t; w_k) \xrightarrow{\mathbb{P}} w_k^s \exp\{(t-1)w_k\}$ , as  $n \rightarrow \infty$ .

*Proof.* In the case  $s = 0$ ,  $F_{n,k}(t; w_k)$  is trivially bounded by 1 since  $|t| \leq 1$ . By the Taylor series expansion  $\log(1+x) = x + O(x^2)$ , we have

$$F_{n,k}(t; w_k) = \exp \left\{ (t-1)w_k \frac{L_{n,-k}}{L_{n,-k} + w_k} + O \left( w_k^2 \frac{\sum_{i \neq k} W_{n,i}^2}{(L_{n,-k} + w_k)^2} \right) \right\}. \quad (13)$$

By Lemma 1.1,

$$\frac{L_{n,-k}}{L_{n,-k} + w_k} = \frac{\bar{V}_{1,n,-k}}{\bar{V}_{1,n,-k} + w_k / (n-1) / C_n^{1-\alpha}} \xrightarrow{\mathbb{P}} 1, \quad (14)$$

where  $\bar{V}_{1,n,-k}$  is the empirical mean in Eq. (6) excluding the element  $V_{1,n,k}$ . Furthermore, by Lemma 1.2,

$$O \left( w_k^2 \frac{\sum_{i \neq k} W_{n,i}^2}{(L_{n,-k} + w_k)^2} \right) \leq O(w_k^2 M_{2,n,-k}) \xrightarrow{\mathbb{P}} 0, \quad (15)$$

where  $M_{s,n,-k}$  is  $M_{s,n}$  computed without  $V_{s,n,k}$ . Combining, we have

$$F_{n,k}(t; w_k) \xrightarrow{\mathbb{P}} \exp\{(t-1)w_k\}. \quad (16)$$

Before proceeding for  $s \geq 1$ , we define

$$Q_{r,n,k}(t; w_k) := \sum_{i \neq k} \frac{W_{n,i}^r}{(L_{n,-k} + w_k + tw_k W_{n,i})^r}, \quad (17)$$

for all  $r, n \geq 1$ . One can easily see that  $Q_{r,n,k}(t; w_k) \leq 1$  for all  $r, n \geq 1$ . For  $r = 1$ , we have

$$\sum_{i \neq k} \frac{W_{n,i}}{L_{n,-k} + w_k + tw_k C_n} \leq Q_{1,n,k}(t; w_k) \leq 1, \quad (18)$$

and

$$\begin{aligned} \sum_{i \neq k} \frac{W_{n,i}}{L_{n,-k} + w_k + tw_k C_n} &= \frac{1}{1 + w_k / L_{n,-k} + tw_k C_n / L_{n,-k}} \\ &= \left\{ 1 + \frac{w_k}{(n-1)C_n^{1-\alpha}} \bar{V}_{s,n,-k}^{-1} + tw_k \frac{C_n^\alpha}{n} \frac{n}{n-1} \bar{V}_{s,n,-k}^{-1} \right\}^{-1} \xrightarrow{\mathbb{P}} 1. \end{aligned} \quad (19)$$

Hence, by the squeeze theorem,  $Q_{1,n,k}(t; w_k) \xrightarrow{\mathbb{P}} 1$ . For  $r \geq 2$ , we have

$$0 \leq Q_{r,n,k}(t; w_k) \leq M_{r,n,-k} \xrightarrow{\mathbb{P}} 0, \quad (20)$$

by Lemma 1.2. Hence, we have  $Q_{r,n,k}(t; w_k) \xrightarrow{\mathbb{P}} 0$  for  $r \geq 2$ .

Now we show that

$$F_{n,k}^{(s)}(t; w_k) = w_k F_{n,k}^{(s-1)}(t; w_k) Q_{1,n,k}(t; w_k) + \sum_{r=2}^s a_{s,r} F_{n,k}^{(s-r)}(t; w_k) Q_{r,n,k}(t; w_k), \quad (21)$$

for some constants  $\{a_{s,r}\}$  for all  $s \geq 1$  and  $r \geq 2$ . We proceed by the mathematical induction. For  $s = 1$ ,

$$\begin{aligned} F_{n,k}^{(1)}(t; w_k) &= \sum_{i \neq k} \frac{w_k W_{n,i}}{L_{n,-k} + w_k + w_k W_{n,i}} \prod_{j \neq i, k} \frac{L_{n,-k} + w_k + tw_k W_{n,j}}{L_{n,-k} + w_k + w_k W_{n,j}} \\ &= w_k F_{n,k}(t; w_k) Q_{1,n,k}(t; w_k). \end{aligned} \quad (22)$$

Now by the inductive hypothesis,

$$\begin{aligned}
 F_{n,k}^{(s+1)}(t; w_k) &= w_k F_{n,k}^{(s)}(t; w_k) Q_{1,n,k}(t; w_k) - w_k^2 F_{n,k}^{(s-1)}(t; w_k) Q_{2,n,k}(t; w_k) \\
 &\quad + \sum_{r=2}^s a_{s,r} (F_{n,k}^{(s+1-r)}(t; w_k) Q_{r,n,k}(t; w_k) - r w_k F_{n,k}^{(s-r)}(t; w_k) Q_{r+1,n,k}(t; w_k)) \\
 &= w_k F_{n,k}^{(s)}(t; w_k) Q_{1,n,k}(t; w_k) + \sum_{r=2}^{s+1} a_{s+1,r} F_{n,k}^{(s+1-r)}(t; w_k) Q_{r,n,k}(t; w_k), \tag{23}
 \end{aligned}$$

where

$$a_{s+1,2} = a_{s,2} - w_k^2, \quad a_{s+1,r} = a_{s,r} - a_{s,r-1}(r-1)w_k \quad \text{for } r \geq 2, \tag{24}$$

so the inductive argument holds.

Having (21), by mathematical induction, we can easily show that  $F_{n,k}^{(s)}(t; w_k)$  is uniformly bounded for all  $s, n \geq 1$ . Moreover,

$$F_{n,k}^{(1)}(t; w_k) = w_k F_{n,k}(t; w_k) Q_{1,n,k}(t; w_k) \xrightarrow{\mathbb{P}} w_k \exp\{(t-1)w_k\}, \tag{25}$$

by (16) and (19). Combining this with (20), by mathematical induction, we can show that for all  $s \geq 1$ ,

$$F_{n,k}^{(s)}(t; w_k) \xrightarrow{\mathbb{P}} w_k^s \exp\{(t-1)w_k\}. \tag{26}$$

□

We will now use our collected results to analyze the asymptotic distribution of the degree random variables; the following result characterizes this distribution:

**Lemma 1.5.** *Fix a node  $k$ . Given  $\{W_{n,k} = w_k\}$ , for some  $w_k > 0$ , the degree  $D_{n,k}$  of node  $k$  converges in distribution to a Poisson random variable with rate  $w_k$ , as  $n \rightarrow \infty$ .*

*Proof.* The PGF of  $D_{n,k}$  is given by

$$\mathbb{E}[t^{D_{n,k}} | W_{n,k} = w_k] = \mathbb{E}[F_{n,k}(t; w_k)], \quad \text{for } |t| \leq 1. \tag{27}$$

Note that these expectations are under the  $\sigma$ -field generated by  $\{W_k = w_k\}$ . For all  $s \geq 0$ , we will derive the limit of  $\mathbb{P}\{D_{n,k} = s | w_k\}$ , as  $n \rightarrow \infty$ , which we note is given by the  $s$ -th order derivatives of the PGF in Eq. (27), evaluated at the argument  $t = 0$ . It therefore suffices to show that  $\mathbb{E}[F_{n,k}^{(s)}(t; w_k)] \rightarrow w_k^s \exp\{(t-1)w_k\}$ , as  $n \rightarrow \infty$ , for all  $s \geq 0$ .

By Lemma 1.4, we know that  $F_{n,k}^{(s)}(t; w_k)$  is uniformly bounded and that  $F_{n,k}^{(s)}(t; w_k) \xrightarrow{\mathbb{P}} w_k^s \exp\{(t-1)w_k\}$ , as  $n \rightarrow \infty$ . Therefore, by uniform integrability,

$$\lim_{n \rightarrow \infty} \mathbb{E}[F_{n,k}^{(s)}(t; w_k)] = \mathbb{E}\left[\lim_{n \rightarrow \infty} F_{n,k}^{(s)}(t; w_k)\right] = w_k^s \exp\{(t-1)w_k\}. \tag{28}$$

□

We are now ready to prove the main theorems in the paper.

*Proof of Theorem 3.1.* We will first verify that, for  $y \gg 1$ ,  $\mathbb{P}\{D_{n,k} = y\} \rightarrow cy^{-1-\alpha}$  for every node  $k$  and for some constant  $c > 0$  as  $n \rightarrow \infty$ . By Lemma 1.5, conditioned on  $\{W_k = w_k\}$ , the degree  $D_{n,k}$  converges in distribution to a Poisson random variable with rate  $w_k$ . Then by dominated convergence,

$$\begin{aligned}
 \lim_{n \rightarrow \infty} \mathbb{P}\{D_{n,k} = y\} &= \lim_{n \rightarrow \infty} \int_0^\infty \mathbb{P}\{D_k = y | w_k\} p_n(dw_k) \\
 &= \int_0^\infty \frac{w_k^y e^{-w_k}}{y!} p(dw_k) \\
 &= \frac{\alpha \Gamma(y - \alpha)}{y! \Gamma(1 - \alpha)} (1 - 2^{\alpha-y}). \tag{29}
 \end{aligned}$$

By the asymptotics of the Gamma function, for  $y \gg 1$ , we have

$$\lim_{n \rightarrow \infty} \mathbb{P}\{D_{n,k} = y\} = cy^{-1-\alpha}, \quad (30)$$

for some constant  $c$ .

Next we show that, for any finite  $m$ , the collection of random variables  $D_{n,1}, \dots, D_{n,m}$  are asymptotically independent, as  $n \rightarrow \infty$ . We compute the (joint) probability generating function of  $(D_{n,1}, \dots, D_{n,m})$ , with  $|t_i| \leq 1$  for  $i = 1, \dots, m$ . By Lemma 1.3,

$$\begin{aligned} \mathbb{E}\left[\prod_{i=1}^m t_i^{D_{n,i}}\right] &= \mathbb{E}\left[\prod_{i=1}^m \prod_{j=i+1}^m \frac{L_n + t_i t_j W_{n,i} W_{n,j}}{L_n + W_{n,i} W_{n,j}} \prod_{j=m+1}^n \frac{L_n + t_i W_{n,i} W_{n,j}}{L_n + W_{n,i} W_{n,j}}\right] \\ &= \mathbb{E}\left[\mathbb{E}\left[\prod_{i=1}^m \prod_{j=i+1}^m \frac{L_{n,m+1:n} + \ell_{n,1:m} + t_i t_j w_i W_{n,j}}{L_{n,m+1:n} + \ell_{n,1:m} + w_i W_{n,j}} \right. \right. \\ &\quad \left. \left. \times \prod_{j=m+1}^n \frac{L_{n,m+1:n} + \ell_{n,1:m} + t_i w_i W_{n,j}}{L_{n,m+1:n} + \ell_{n,1:m} + w_i W_{n,j}} \mid W_{n,1:m} = w_{1:m}\right]\right]. \end{aligned} \quad (31)$$

Given  $w_{1:m}$ , by a similar argument as in the proof of Lemma 1.4, one can easily show that

$$\prod_{j=i+1}^m \frac{L_{n,m+1:n} + \ell_{n,1:m} + t_i t_j w_i W_{n,j}}{L_{n,m+1:n} + \ell_{n,1:m} + w_i W_{n,j}} \xrightarrow{\mathbb{P}} 1, \quad \text{as } n \rightarrow \infty, \quad (32)$$

and

$$\prod_{j=m+1}^n \frac{L_{n,m+1:n} + \ell_{n,1:m} + t_i w_i W_{n,j}}{L_{n,m+1:n} + \ell_{n,1:m} + w_i W_{n,j}} \xrightarrow{\mathbb{P}} \exp\{(t_i - 1)w_i\}, \quad \text{as } n \rightarrow \infty. \quad (33)$$

Hence, again by a similar argument as in the proof of Lemma 1.4, we have

$$\lim_{n \rightarrow \infty} \mathbb{E}\left[\prod_{i=1}^m t_i^{D_{n,i}}\right] = \prod_{i=1}^m \mathbb{E}[\exp\{(t_i - 1)W_i\}], \quad (34)$$

that is, the joint PGF asymptotically factorizes into the product of the PGFs for i.i.d. random variables, and the result follows.  $\square$

*Proof of Theorem 3.2.* Using the fact that the expected number of nodes  $E_n := \sum_{i=1}^n D_{n,i}/2$ , we may take  $t_1 = \dots = t_n = \sqrt{t}$  and obtain

$$\mathbb{E}[t^{E_n}] = \mathbb{E}\left[\prod_{i < j \leq n} \frac{L_n + t W_{n,i} W_{n,j}}{L_n + W_{n,i} W_{n,j}}\right]. \quad (35)$$

We evaluate the derivative of the PGF to obtain the first moment

$$\mathbb{E}[E_n] = \frac{\partial \mathbb{E}[t^{E_n}]}{\partial t} \Big|_{t=1} = \mathbb{E}\left[\sum_{i < j \leq n} \frac{W_{n,i} W_{n,j}}{L_n + W_{n,i} W_{n,j}}\right] \leq \frac{1}{2} \mathbb{E}\left[\sum_{i \leq j \leq n} \frac{W_{n,i} W_{n,j}}{L_n}\right] = \frac{n}{2} \mathbb{E}[W_n]. \quad (36)$$

Since

$$\mathbb{E}[W_n] = \frac{1}{Z_n} \left\{ \frac{C_n^{1-\alpha}}{1-\alpha} - \gamma(1-\alpha, C_n) \right\}, \quad (37)$$

we have

$$\mathbb{E}[E_n] = O(nC_n^{1-\alpha}). \quad (38)$$

$\square$

*Proof of Theorem 5.1.* Recall that

$$\mathbb{P}\{X = x \mid r\} = \prod_{i < j \leq n} \frac{r_{i,j}}{1 + r_{i,j}} = G^{-1}(r) \prod_{i < j \leq n} A_{i,j}^{x_{i,j}} \prod_{i=1}^n U_i^{D_{n,i}}, \quad (39)$$

where  $A := (A_{i,j})_{i < j \leq n}$  and

$$G(r) := \prod_{i < j \leq n} (1 + A_{i,j} U_i U_j). \quad (40)$$

Since  $\sum_x \mathbb{P}\{X = x \mid r\} = 1$ , we have

$$G(r) = \sum_x \prod_{i < j \leq n} A_{i,j}^{x_{i,j}} \prod_{i=1}^n u_i^{D_{n,i}}. \quad (41)$$

The joint PGF of  $(D_{n,1}, \dots, D_{n,n})$  is then

$$\begin{aligned} \mathbb{E}\left[\prod_{i=1}^n t_i^{D_{n,i}} \mid A, W_{n,1:n}\right] &= \sum_x \mathbb{P}\{X = x \mid r\} \prod_{i=1}^n t_i^{D_{n,i}(x)} \\ &= G^{-1}(r) \sum_x \prod_{i < j \leq n} A_{i,j}^{x_{i,j}} \prod_{i=1}^n (t_i U_i)^{D_{n,i}} \\ &= \prod_{i < j \leq n} \frac{1 + A_{i,j} t_i t_j U_i U_j}{1 + A_{i,j} U_i U_j}. \end{aligned} \quad (42)$$

The remainder of the proof follows analogously to the proof of [Theorem 3.1](#) above. □

## References

- Britton, T., Deijfen, M., and Martin-Löf, A. Generating simple random graphs with prescribed degree distribution. *Journal of Statistical Physics*, 124(6):1377–1397, 2006.
- Kingma, D. P. and Welling, M. Auto-encoding variational Bayes. In *ICLR*, 2014.
- Knowles, D. A. Stochastic gradient variational Bayes for gamma approximating distributions. *arXiv preprint arXiv:1509.01631*, 2015.
- Salimans, T. and Knowles, D. A. Fixed-form variational posterior approximation through stochastic linear regression. *Bayesian Analysis*, 8(4):837–882, 2013.
